# Supplementary material for: Facilitation of Balsam Fir by Trembling Aspen in the Boreal Forest: Do Ectomycorrhizal Communities Matter?
Source: Front Plant Sci. 2019 Jul 18;10:932. doi: 10.3389/fpls.2019.00932 (PMC6657621; doi:10.3389/fpls.2019.00932)
Supplement: Supplementary file 1 [file Table_1.XLSX]

## Sheet: Feuille1
Supplementary Table 1 : summary of parameters estimates of Mod1
Regressions:
		Estimate	Std.Err	z-value	P(>|z|)
	Apical	~
	N.total	0.547	0.128	4.284	0
	Stand	-0.208	0.441	-0.472	0.637
	Ericaceous	0.077	0.227	0.338	0.735
	Percentage BS	0.256	0.167	1.534	0.125
	Percentage BF	-0.146	0.113	-1.289	0.197
	Ramification index	0.253	0.104	2.425	0.015
	NMDS1	0.163	0.129	1.269	0.205
	NMDS2	-0.138	0.098	-1.404	0.16
	Lateral	~
	N.total	0.609	0.126	4.828	0
	Stand	0.138	0.435	0.316	0.752
	Ericaceous	0.11	0.224	0.49	0.624
	Percentage BS	0.272	0.165	1.649	0.099
	Percentage BF	0.017	0.112	0.154	0.878
	Ramification index	0.254	0.103	2.472	0.013
	NMDS1	0.073	0.127	0.572	0.567
	NMDS2	-0.044	0.097	-0.451	0.652
	N.total	~
	Stand	0.049	0.469	0.105	0.916
	Ericaceous	-0.183	0.24	-0.763	0.446
	Percentage BS	-0.469	0.166	-2.827	0.005
	Percentage BF	-0.111	0.12	-0.925	0.355
	Ramification index	0.209	0.107	1.947	0.051
	NMDS1	-0.226	0.134	-1.692	0.091
	NMDS2	-0.211	0.101	-2.096	0.036
	Ramification index	~
	Stand	-1.573	0.473	-3.327	0.001
	Percentage BS	0.371	0.204	1.816	0.069
	Percentage BF	-0.023	0.152	-0.153	0.879
	NMDS1	~
	Stand	1.499	0.201	7.474	0
	NMDS2	~
	Ericaceous	0.773	0.266	2.907	0.004
	Ericaceous	~
	Stand	0.5	0.118	4.243	0
	Percentage BS	~
	Stand	1.708	0.167	10.254	0
	Percentage BF	~
	Stand	-1.306	0.224	-5.825	0
Covariances:
	Estimate	Std.Err	z-value	P(>|z|)
	.Apical	~~
	.Lateral	0.436	0.1	4.349	0
	Basal diameter	0.429	0.12	3.593	0
	.Lateral	~~
	Basal diameter	0.432	0.119	3.625	0
Variances:
	Estimate	Std.Err	z-value	P(>|z|)
	.Apical	0.598	0.115	5.196	0
	.Lateral	0.59	0.114	5.196	0
	.N.total	0.466	0.09	5.196	0
	.Ramification index	0.75	0.144	5.196	0
	.NMDS1	0.482	0.093	5.196	0
	.NMDS2	0.849	0.163	5.196	0
	.Ericaceous	0.167	0.032	5.196	0
	.Percentage BS	0.333	0.064	5.196	0
	.Percentage BF	0.603	0.116	5.196	0
	Colar diameter	0.981	0.189	5.196	0
R-Square:
	Estimate
	Apical	0.374
	Lateral	0.366
	N.total	0.544
	Ramification index	0.235
	NMDS1	0.508
	NMDS2	0.135
	Ericaceous	0.25
	Percentage BS	0.661
	Percentage BF	0.386
